# Supplementary material for: The A2B adenosine receptor in MDA-MB-231 breast cancer cells diminishes ERK1/2 phosphorylation by activation of MAPK-phosphatase-1
Source: PubMed Central journal article supplement (PMC6114864; doi:10.1371/journal.pone.0202914), 2018-08-29
Supplement: pone.0202914.s001.pdf [file pone.0202914.s001.pdf]

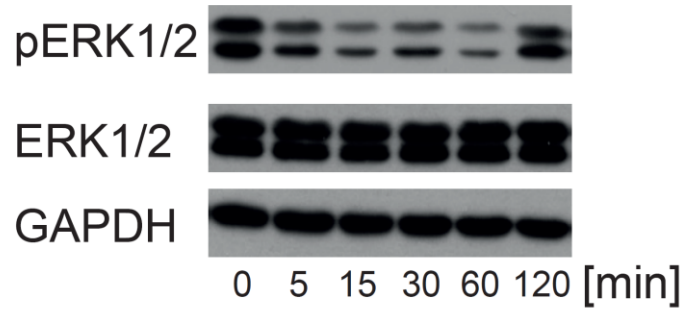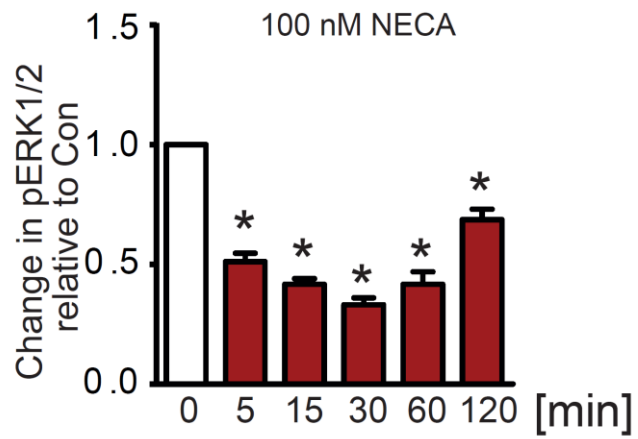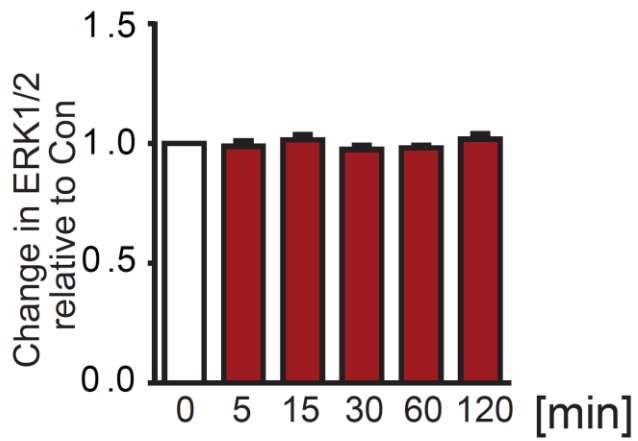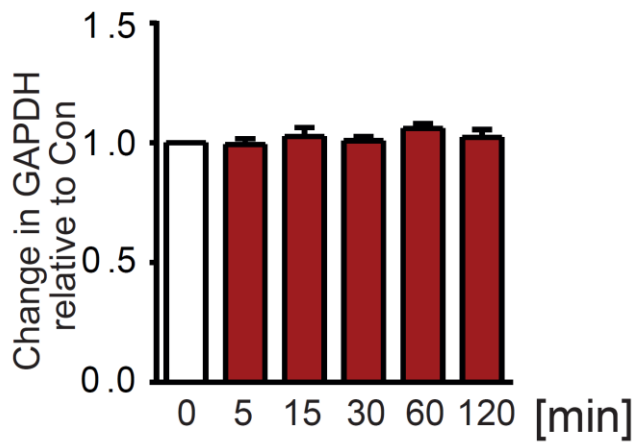

S1 Fig
